# Supplementary material
Source: PubMed Central journal article supplement (PMC10790303)
Supplement: NIHMS1957616-supplement-Table_S1.pdf [file NIHMS1957616-supplement-Table_S1.pdf]

**Figure 1B: Fear Conditioning**

| <b>Analysis: 3-way ANOVA</b>                      |                             |                     |                         |                |
|---------------------------------------------------|-----------------------------|---------------------|-------------------------|----------------|
|                                                   | <b>% of total variation</b> | <b>F (DFn, DFd)</b> | <b>P value</b>          | <b>Summary</b> |
| Sex                                               | 3.604                       | F (1, 59) = 3.696   | 0.0594                  | ns             |
| Age                                               | 9.291                       | F (1, 59) = 9.526   | 0.0031                  | **             |
| LPS                                               | 6.143                       | F (1, 59) = 6.298   | 0.0149                  | *              |
| Sex x Age                                         | 8.779                       | F (1, 59) = 9.001   | 0.0039                  | **             |
| Sex x LPS                                         | 0.366                       | F (1, 59) = 0.3753  | 0.5425                  | ns             |
| Age x LPS                                         | 4.754                       | F (1, 59) = 4.874   | 0.0312                  | *              |
| Sex x Age x LPS                                   | 4.39                        | F (1, 59) = 4.501   | 0.0381                  | *              |
| <b>Posthoc: Šídák's multiple comparisons test</b> |                             |                     |                         |                |
|                                                   | <b>t</b>                    | <b>DF</b>           | <b>Adjusted P value</b> | <b>Summary</b> |
| Male:Adult Saline vs. Female:Adult Saline         | 0.2121                      | 59                  | >0.9999                 | ns             |
| Male:Adult LPS vs. Female:Adult LPS               | 1.229                       | 59                  | 0.9522                  | ns             |
| Male:Aged Saline vs. Female:Aged Saline           | 1.135                       | 59                  | 0.9735                  | ns             |
| Male:Aged LPS vs. Female:Aged LPS                 | 3.97                        | 59                  | 0.0024                  | **             |
| Male:Adult Saline vs. Male:Adult LPS              | 0.5737                      | 59                  | >0.9999                 | ns             |
| Male:Aged Saline vs. Male:Aged LPS                | 4.098                       | 59                  | 0.0015                  | **             |
| Female:Adult Saline vs. Female:Adult LPS          | 0.8907                      | 59                  | 0.9966                  | ns             |
| Female:Aged Saline vs. Female:Aged LPS            | 0.9755                      | 59                  | 0.9923                  | ns             |
| Male:Adult Saline vs. Male:Aged Saline            | 0.9112                      | 59                  | 0.9958                  | ns             |
| Male:Adult LPS vs. Male:Aged LPS                  | 5.198                       | 59                  | <0.0001                 | ****           |
| Female:Adult Saline vs. Female:Aged Saline        | 3.054E-09                   | 59                  | >0.9999                 | ns             |
| Female:Adult LPS vs. Female:Aged LPS              | 0.08483                     | 59                  | >0.9999                 | ns             |
