# Supplementary material
Source: PubMed Central journal article supplement (PMC10790303)
Supplement: NIHMS1957616-supplement-Table_S2.pdf [file NIHMS1957616-supplement-Table_S2.pdf]

**Supplemental Figure 1A: Body Mass**

| <b>Analysis: 2-way ANOVA</b> | <b>% of total variation</b> | <b>F (DFn, DFd)</b> | <b>P value</b> | <b>Summary</b> |
|------------------------------|-----------------------------|---------------------|----------------|----------------|
| Interaction                  | 2.891                       | F (1, 60) = 22.35   | <0.0001        | ****           |
| Age                          | 34.6                        | F (1, 60) = 267.6   | <0.0001        | ****           |
| Sex                          | 54.75                       | F (1, 60) = 423.4   | <0.0001        | ****           |

| <b>Posthoc: Tukey's multiple comparisons test</b> | <b>q</b> | <b>DF</b> | <b>Adjusted P value</b> | <b>Summary</b> |
|---------------------------------------------------|----------|-----------|-------------------------|----------------|
| Adult:Male vs. Adult:Female                       | 15.85    | 60        | <0.0001                 | ****           |
| Adult:Male vs. Aged:Male                          | 21.09    | 60        | <0.0001                 | ****           |
| Adult:Male vs. Aged:Female                        | 4.219    | 60        | 0.0209                  | *              |
| Adult:Female vs. Aged:Male                        | 36.94    | 60        | <0.0001                 | ****           |
| Adult:Female vs. Aged:Female                      | 11.63    | 60        | <0.0001                 | ****           |
| Aged:Male vs. Aged:Female                         | 25.3     | 60        | <0.0001                 | ****           |

**Supplemental Figure 1B: Fear Conditioning - Novel Context**

| <b>Analysis: 3-way ANOVA</b> | <b>% of total variation</b> | <b>F (DFn, DFd)</b> | <b>P value</b> | <b>Summary</b> |
|------------------------------|-----------------------------|---------------------|----------------|----------------|
| Age                          | 2.296                       | F (1, 53) = 1.430   | 0.2371         | ns             |
| Sex                          | 1.092                       | F (1, 53) = 0.6803  | 0.4132         | ns             |
| Treatment                    | 3.515                       | F (1, 53) = 2.189   | 0.1449         | ns             |
| Age x Sex                    | 2.418                       | F (1, 53) = 1.506   | 0.2252         | ns             |
| Age x Treatment              | 1.929                       | F (1, 53) = 1.201   | 0.278          | ns             |
| Sex x Treatment              | 0.634                       | F (1, 53) = 0.3948  | 0.5325         | ns             |
| Age x Sex x Treatment        | 2.827                       | F (1, 53) = 1.761   | 0.1902         | ns             |

**Supplemental Figure 1C: Fear Conditioning - Female Dose-Response**

| <b>Analysis: 2-way ANOVA</b> | <b>% of total variation</b> | <b>F (DFn, DFd)</b> | <b>P value</b> | <b>Summary</b> |
|------------------------------|-----------------------------|---------------------|----------------|----------------|
| Interaction                  | 0.4941                      | F (3, 52) = 0.09500 | 0.9625         | ns             |
| Age                          | 0.6075                      | F (1, 52) = 0.3504  | 0.5564         | ns             |
| LPS                          | 8.788                       | F (3, 52) = 1.689   | 0.1806         | ns             |
