# Supplementary material
Source: PubMed Central journal article supplement (PMC10790303)
Supplement: NIHMS1957616-supplement-Table_S3.pdf [file NIHMS1957616-supplement-Table_S3.pdf]

**Figure 2A: Hippocampal *I1b* mRNA 48 h**

| <b>Analysis: 3-way ANOVA</b>                      | <b>% of total variation</b> | <b>F (DFn, DFd)</b> | <b>P value</b>          | <b>Summary</b> |
|---------------------------------------------------|-----------------------------|---------------------|-------------------------|----------------|
| Age                                               | 26.35                       | F (1, 23) = 21.29   | 0.0001                  | ***            |
| Sex                                               | 0.1369                      | F (1, 23) = 0.1106  | 0.7425                  | ns             |
| LPS                                               | 5.149                       | F (1, 23) = 4.161   | 0.053                   | ns             |
| Age x Sex                                         | 1.174                       | F (1, 23) = 0.9485  | 0.3402                  | ns             |
| Age x LPS                                         | 14.39                       | F (1, 23) = 11.63   | 0.0024                  | **             |
| Sex x LPS                                         | 7.89                        | F (1, 23) = 6.376   | 0.0189                  | *              |
| Age x Sex x LPS                                   | 16.49                       | F (1, 23) = 13.32   | 0.0013                  | **             |
| <b>Posthoc: Šídák's multiple comparisons test</b> |                             |                     |                         |                |
|                                                   | <b>t</b>                    | <b>DF</b>           | <b>Adjusted P value</b> | <b>Summary</b> |
| Adult:Male Saline vs. Aged:Male Saline            | 0.7009                      | 23                  | 0.9997                  | ns             |
| Adult:Male LPS vs. Aged:Male LPS                  | 6.023                       | 23                  | <0.0001                 | ****           |
| Adult:Female Saline vs. Aged:Female Saline        | 1.996                       | 23                  | 0.5112                  | ns             |
| Adult:Female LPS vs. Aged:Female LPS              | 1.844                       | 23                  | 0.6232                  | ns             |
| Adult:Male Saline vs. Adult:Male LPS              | 1.188                       | 23                  | 0.9667                  | ns             |
| Adult:Female Saline vs. Adult:Female LPS          | 0.1331                      | 23                  | >0.9999                 | ns             |
| Aged:Male Saline vs. Aged:Male LPS                | 5.536                       | 23                  | 0.0001                  | ***            |
| Aged:Female Saline vs. Aged:Female LPS            | 0.373                       | 23                  | >0.9999                 | ns             |
| Adult:Male Saline vs. Adult:Female Saline         | 0.09346                     | 23                  | >0.9999                 | ns             |
| Adult:Male LPS vs. Adult:Female LPS               | 1.211                       | 23                  | 0.9618                  | ns             |
| Aged:Male Saline vs. Aged:Female Saline           | 2.635                       | 23                  | 0.1637                  | ns             |
| Aged:Male LPS vs. Aged:Female LPS                 | 3.506                       | 23                  | 0.0226                  | *              |

**Figure 2B: Hippocampal IL1-β protein 48 h**

| <b>Analysis: 3-way ANOVA</b>                      | <b>% of total variation</b> | <b>F (DFn, DFd)</b> | <b>P value</b>          | <b>Summary</b> |
|---------------------------------------------------|-----------------------------|---------------------|-------------------------|----------------|
| Age                                               | 7.53                        | F (1, 24) = 5.650   | 0.0258                  | *              |
| Sex                                               | 0.02267                     | F (1, 24) = 0.01701 | 0.8973                  | ns             |
| LPS                                               | 19.55                       | F (1, 24) = 14.67   | 0.0008                  | ***            |
| Age x Sex                                         | 13.97                       | F (1, 24) = 10.49   | 0.0035                  | **             |
| Age x LPS                                         | 1.936                       | F (1, 24) = 1.453   | 0.2398                  | ns             |
| Sex x LPS                                         | 2.287                       | F (1, 24) = 1.716   | 0.2027                  | ns             |
| Age x Sex x LPS                                   | 22.66                       | F (1, 24) = 17.00   | 0.0004                  | ***            |
| <b>Posthoc: Šídák's multiple comparisons test</b> |                             |                     |                         |                |
|                                                   | <b>t</b>                    | <b>DF</b>           | <b>Adjusted P value</b> | <b>Summary</b> |
| Adult:Male Saline vs. Aged:Male Saline            | 0.1337                      | 24                  | >0.9999                 | ns             |
| Adult:Male LPS vs. Aged:Male LPS                  | 5.517                       | 24                  | 0.0001                  | ***            |
| Adult:Female Saline vs. Aged:Female Saline        | 1.093                       | 24                  | 0.9822                  | ns             |
| Adult:Female LPS vs. Aged:Female LPS              | 1.905                       | 24                  | 0.5749                  | ns             |
| Adult:Male Saline vs. Adult:Male LPS              | 0.09532                     | 24                  | >0.9999                 | ns             |
| Adult:Female Saline vs. Adult:Female LPS          | 2.742                       | 24                  | 0.1282                  | ns             |
| Aged:Male Saline vs. Aged:Male LPS                | 4.886                       | 24                  | 0.0007                  | ***            |
| Aged:Female Saline vs. Aged:Female LPS            | 0.2115                      | 24                  | >0.9999                 | ns             |
| Adult:Male Saline vs. Adult:Female Saline         | 0.2798                      | 24                  | >0.9999                 | ns             |
| Adult:Male LPS vs. Adult:Female LPS               | 3.117                       | 24                  | 0.0549                  | ns             |
| Aged:Male Saline vs. Aged:Female Saline           | 1.135                       | 24                  | 0.9761                  | ns             |
| Aged:Male LPS vs. Aged:Female LPS                 | 4.306                       | 24                  | 0.0029                  | **             |

| Figure 2C: <i>Il1b</i> mRNA time course           |                      |                      |         |         |
|---------------------------------------------------|----------------------|----------------------|---------|---------|
| Analysis: 3-way ANOVA                             | % of total variation | F (DFn, DFd)         | P value | Summary |
| LPS                                               | 42.08                | F (3, 46) = 16.45    | <0.0001 | ****    |
| Sex                                               | 2.293                | F (1, 46) = 2.689    | 0.1079  | ns      |
| Age                                               | 3.748                | F (1, 46) = 4.395    | 0.0416  | *       |
| LPS x Sex                                         | 2.863                | F (3, 46) = 1.119    | 0.3512  | ns      |
| LPS x Age                                         | 2.122                | F (3, 46) = 0.8293   | 0.4846  | ns      |
| Sex x Age                                         | 3.615                | F (1, 46) = 4.239    | 0.0452  | *       |
| LPS x Sex x Age                                   | 1.703                | F (3, 46) = 0.6656   | 0.5775  | ns      |
| Figure 2C: <i>Il1b</i> mRNA time course - males   |                      |                      |         |         |
| Analysis: 2-way ANOVA                             | % of total variation | F (DFn, DFd)         | P value | Summary |
| Interaction                                       | 4.686                | F (3, 22) = 0.8260   | 0.4936  | ns      |
| LPS                                               | 43.83                | F (3, 22) = 7.727    | 0.001   | **      |
| Age                                               | 9.274                | F (1, 22) = 4.905    | 0.0375  | *       |
| Figure 2C: <i>Il1b</i> mRNA time course - females |                      |                      |         |         |
| Analysis: 2-way ANOVA                             | % of total variation | F (DFn, DFd)         | P value | Summary |
| Interaction                                       | 0.5072               | F (3, 24) = 0.1070   | 0.9552  | ns      |
| LPS                                               | 61.58                | F (3, 24) = 12.99    | <0.0001 | ****    |
| Age                                               | 0.003287             | F (1, 24) = 0.002080 | 0.964   | ns      |
| Figure 2D: <i>Bdnf</i> time course                |                      |                      |         |         |
| Analysis: 3-way ANOVA                             | % of total variation | F (DFn, DFd)         | P value | Summary |
| LPS                                               | 17.39                | F (3, 48) = 5.837    | 0.0018  | **      |
| Sex                                               | 6.565                | F (1, 48) = 6.609    | 0.0133  | *       |
| Age                                               | 8.807                | F (1, 48) = 8.866    | 0.0045  | **      |
| LPS x Sex                                         | 2.174                | F (3, 48) = 0.7297   | 0.5394  | ns      |
| LPS x Age                                         | 3.387                | F (3, 48) = 1.137    | 0.3437  | ns      |
| Sex x Age                                         | 7.032                | F (1, 48) = 7.079    | 0.0106  | *       |
| LPS x Sex x Age                                   | 6.535                | F (3, 48) = 2.193    | 0.101   | ns      |
| Figure 2D: <i>Bdnf</i> time course - males        |                      |                      |         |         |
| Analysis: 2-way ANOVA                             | % of total variation | F (DFn, DFd)         | P value | Summary |
| Interaction                                       | 13.68                | F (3, 23) = 2.056    | 0.1341  | ns      |
| LPS                                               | 9.98                 | F (3, 23) = 1.499    | 0.2412  | ns      |
| Age                                               | 23.56                | F (1, 23) = 10.62    | 0.0035  | **      |
| Figure 2D: <i>Bdnf</i> time course - females      |                      |                      |         |         |
| Analysis: 2-way ANOVA                             | % of total variation | F (DFn, DFd)         | P value | Summary |
| Interaction                                       | 2.32                 | F (3, 25) = 0.3843   | 0.7652  | ns      |
| LPS                                               | 47.04                | F (3, 25) = 7.792    | 0.0008  | ***     |
| Age                                               | 0.1781               | F (1, 25) = 0.08850  | 0.7686  | ns      |
