# Supplementary material
Source: PubMed Central journal article supplement (PMC10790303)
Supplement: NIHMS1957616-supplement-Table_S5.pdf [file NIHMS1957616-supplement-Table_S5.pdf]

| <b>Figure 3B: IBA1+ Microglia (#/ROI)</b>                      |                             |                      |                         |                |
|----------------------------------------------------------------|-----------------------------|----------------------|-------------------------|----------------|
| <b>Analysis: 3-way ANOVA</b>                                   | <b>% of total variation</b> | <b>F (DFn, DFd)</b>  | <b>P value</b>          | <b>Summary</b> |
| Age                                                            | 28.81                       | F (1, 21) = 10.53    | 0.0039                  | **             |
| Sex                                                            | 1.155                       | F (1, 21) = 0.4220   | 0.523                   | ns             |
| LPS                                                            | 0.4474                      | F (1, 21) = 0.1635   | 0.69                    | ns             |
| Age x Sex                                                      | 1.226                       | F (1, 21) = 0.4482   | 0.5105                  | ns             |
| Age x LPS                                                      | 4.525                       | F (1, 21) = 1.654    | 0.2125                  | ns             |
| Sex x LPS                                                      | 0.9847                      | F (1, 21) = 0.3599   | 0.555                   | ns             |
| Age x Sex x LPS                                                | 7.424                       | F (1, 21) = 2.713    | 0.1144                  | ns             |
| <b>Posthoc: Šidák's multiple comparisons test</b>              | <b>t</b>                    | <b>DF</b>            | <b>Adjusted P value</b> | <b>Summary</b> |
| Adult:Male Saline vs. Aged:Male Saline                         | 2.705                       | 21                   | 0.1482                  | ns             |
| Adult:Male LPS vs. Aged:Male LPS                               | 0.1898                      | 21                   | >0.9999                 | ns             |
| Adult:Female Saline vs. Aged:Female Saline                     | 1.632                       | 21                   | 0.7772                  | ns             |
| Adult:Female LPS vs. Aged:Female LPS                           | 2.267                       | 21                   | 0.3401                  | ns             |
| Adult:Male Saline vs. Adult:Male LPS                           | 1.023                       | 21                   | 0.9899                  | ns             |
| Adult:Female Saline vs. Adult:Female LPS                       | 0.08137                     | 21                   | >0.9999                 | ns             |
| Aged:Male Saline vs. Aged:Male LPS                             | 1.933                       | 21                   | 0.5638                  | ns             |
| Aged:Female Saline vs. Aged:Female LPS                         | 0.2734                      | 21                   | >0.9999                 | ns             |
| Adult:Male Saline vs. Adult:Female Saline                      | 0.1334                      | 21                   | >0.9999                 | ns             |
| Adult:Male LPS vs. Adult:Female LPS                            | 1.255                       | 21                   | 0.9518                  | ns             |
| Aged:Male Saline vs. Aged:Female Saline                        | 1.023                       | 21                   | 0.9899                  | ns             |
| Aged:Male LPS vs. Aged:Female LPS                              | 1.202                       | 21                   | 0.9644                  | ns             |
| <b>Figure 3C: IBA1+ Staining Area (x10<sup>6</sup> voxels)</b> |                             |                      |                         |                |
| <b>Analysis: 3-way ANOVA</b>                                   | <b>% of total variation</b> | <b>F (DFn, DFd)</b>  | <b>P value</b>          | <b>Summary</b> |
| Age                                                            | 6.452                       | F (1, 21) = 2.965    | 0.0998                  | ns             |
| Sex                                                            | 0.2116                      | F (1, 21) = 0.09727  | 0.7582                  | ns             |
| LPS                                                            | 4.591                       | F (1, 21) = 2.110    | 0.1611                  | ns             |
| Age x Sex                                                      | 4.876                       | F (1, 21) = 2.241    | 0.1493                  | ns             |
| Age x LPS                                                      | 4.534                       | F (1, 21) = 2.084    | 0.1636                  | ns             |
| Sex x LPS                                                      | 28.59                       | F (1, 21) = 13.14    | 0.0016                  | **             |
| Age x Sex x LPS                                                | 0.01199                     | F (1, 21) = 0.005510 | 0.9415                  | ns             |
| <b>Posthoc: Šidák's multiple comparisons test</b>              | <b>t</b>                    | <b>DF</b>            | <b>Adjusted P value</b> | <b>Summary</b> |
| Adult:Male Saline vs. Aged:Male Saline                         | 0.981                       | 21                   | 0.9929                  | ns             |
| Adult:Male LPS vs. Aged:Male LPS                               | 2.253                       | 21                   | 0.3486                  | ns             |
| Adult:Female Saline vs. Aged:Female Saline                     | 0.6348                      | 21                   | 0.9999                  | ns             |
| Adult:Female LPS vs. Aged:Female LPS                           | 0.8557                      | 21                   | 0.9979                  | ns             |
| Adult:Male Saline vs. Adult:Male LPS                           | 1.821                       | 21                   | 0.6462                  | ns             |
| Adult:Female Saline vs. Adult:Female LPS                       | 1.812                       | 21                   | 0.6526                  | ns             |
| Aged:Male Saline vs. Aged:Male LPS                             | 3.419                       | 21                   | 0.0305                  | *              |
| Aged:Female Saline vs. Aged:Female LPS                         | 0.3214                      | 21                   | >0.9999                 | ns             |
| Adult:Male Saline vs. Adult:Female Saline                      | 2.921                       | 21                   | 0.0937                  | ns             |
| Adult:Male LPS vs. Adult:Female LPS                            | 0.8682                      | 21                   | 0.9976                  | ns             |
| Aged:Male Saline vs. Aged:Female Saline                        | 1.161                       | 21                   | 0.9724                  | ns             |
| Aged:Male LPS vs. Aged:Female LPS                              | 2.512                       | 21                   | 0.2178                  | ns             |
| <b>Figure 3D: Soma Volume (μm<sup>3</sup>)</b>                 |                             |                      |                         |                |
| <b>Analysis: 3-way ANOVA</b>                                   | <b>% of total variation</b> | <b>F (DFn, DFd)</b>  | <b>P value</b>          | <b>Summary</b> |
| Age                                                            | 0.2787                      | F (1, 23) = 0.1151   | 0.7375                  | ns             |
| Sex                                                            | 34.89                       | F (1, 23) = 14.41    | 0.0009                  | ***            |
| LPS                                                            | 1.808                       | F (1, 23) = 0.7470   | 0.3964                  | ns             |
| Age x Sex                                                      | 0.2657                      | F (1, 23) = 0.1097   | 0.7434                  | ns             |
| Age x LPS                                                      | 1.482                       | F (1, 23) = 0.6121   | 0.442                   | ns             |
| Sex x LPS                                                      | 0.8926                      | F (1, 23) = 0.3688   | 0.5496                  | ns             |
| Age x Sex x LPS                                                | 4.093                       | F (1, 23) = 1.691    | 0.2064                  | ns             |
| <b>Posthoc: Šidák's multiple comparisons test</b>              | <b>t</b>                    | <b>DF</b>            | <b>Adjusted P value</b> | <b>Summary</b> |
| Adult:Male Saline vs. Aged:Male Saline                         | 0.2684                      | 23                   | >0.9999                 | ns             |
| Adult:Male LPS vs. Aged:Male LPS                               | 0.2602                      | 23                   | >0.9999                 | ns             |
| Adult:Female Saline vs. Aged:Female Saline                     | 0.6671                      | 23                   | 0.9998                  | ns             |
| Adult:Female LPS vs. Aged:Female LPS                           | 1.405                       | 23                   | 0.8982                  | ns             |
| Adult:Male Saline vs. Adult:Male LPS                           | 0.1331                      | 23                   | >0.9999                 | ns             |
| Adult:Female Saline vs. Adult:Female LPS                       | 1.814                       | 23                   | 0.6455                  | ns             |
| Aged:Male Saline vs. Aged:Male LPS                             | 0.3954                      | 23                   | >0.9999                 | ns             |
| Aged:Female Saline vs. Aged:Female LPS                         | 0.2887                      | 23                   | >0.9999                 | ns             |
| Adult:Male Saline vs. Adult:Female Saline                      | 2.742                       | 23                   | 0.1308                  | ns             |
| Adult:Male LPS vs. Adult:Female LPS                            | 0.795                       | 23                   | 0.9989                  | ns             |
| Aged:Male Saline vs. Aged:Female Saline                        | 1.623                       | 23                   | 0.7791                  | ns             |
| Aged:Male LPS vs. Aged:Female LPS                              | 2.46                        | 23                   | 0.2326                  | ns             |

| Supplemental Table 4: CA1 IBA1+ Microglia (#/ROI)                       |                      |                     |                  |         |
|-------------------------------------------------------------------------|----------------------|---------------------|------------------|---------|
| Analysis: 3-way ANOVA                                                   | % of total variation | F (DFn, DFd)        | P value          | Summary |
| Age                                                                     | 1.798                | F (1, 21) = 0.6112  | 0.4431           | ns      |
| Sex                                                                     | 6.728                | F (1, 21) = 2.287   | 0.1453           | ns      |
| LPS                                                                     | 4.07                 | F (1, 21) = 1.384   | 0.2526           | ns      |
| Age x Sex                                                               | 10.7                 | F (1, 21) = 3.636   | 0.0703           | ns      |
| Age x LPS                                                               | 6.99                 | F (1, 21) = 2.377   | 0.1381           | ns      |
| Sex x LPS                                                               | 3.675                | F (1, 21) = 1.250   | 0.2763           | ns      |
| Age x Sex x LPS                                                         | 0.7475               | F (1, 21) = 0.2541  | 0.6194           | ns      |
| Supplemental Table 4: CA1 IBA1+ Staining Area (x10 <sup>6</sup> voxels) |                      |                     |                  |         |
| Analysis: 3-way ANOVA                                                   | % of total variation | F (DFn, DFd)        | P value          | Summary |
| Age                                                                     | 1.944                | F (1, 20) = 0.9908  | 0.3314           | ns      |
| Sex                                                                     | 1.719                | F (1, 20) = 0.8760  | 0.3605           | ns      |
| LPS                                                                     | 2.453                | F (1, 20) = 1.250   | 0.2767           | ns      |
| Age x Sex                                                               | 11.97                | F (1, 20) = 6.100   | 0.0226           | *       |
| Age x LPS                                                               | 3.072                | F (1, 20) = 1.566   | 0.2252           | ns      |
| Sex x LPS                                                               | 30.09                | F (1, 20) = 15.34   | 0.0009           | ***     |
| Age x Sex x LPS                                                         | 1.788                | F (1, 20) = 0.9111  | 0.3512           | ns      |
| Posthoc: Šídák's multiple comparisons test                              | t                    | DF                  | Adjusted P value | Summary |
| Adult:Male Saline vs. Aged:Male Saline                                  | 1.584                | 20                  | 0.809            | ns      |
| Adult:Male LPS vs. Aged:Male LPS                                        | 1.881                | 20                  | 0.6057           | ns      |
| Adult:Female Saline vs. Aged:Female Saline                              | 1.84                 | 20                  | 0.6354           | ns      |
| Adult:Female LPS vs. Aged:Female LPS                                    | 0.3658               | 20                  | >0.9999          | ns      |
| Adult:Male Saline vs. Adult:Male LPS                                    | 2.369                | 20                  | 0.2891           | ns      |
| Adult:Female Saline vs. Adult:Female LPS                                | 2.502                | 20                  | 0.2263           | ns      |
| Aged:Male Saline vs. Aged:Male LPS                                      | 2.666                | 20                  | 0.1644           | ns      |
| Aged:Female Saline vs. Aged:Female LPS                                  | 0.296                | 20                  | >0.9999          | ns      |
| Adult:Male Saline vs. Adult:Female Saline                               | 4.47                 | 20                  | 0.0028           | **      |
| Adult:Male LPS vs. Adult:Female LPS                                     | 0.6852               | 20                  | 0.9998           | ns      |
| Aged:Male Saline vs. Aged:Female Saline                                 | 0.6678               | 20                  | 0.9998           | ns      |
| Aged:Male LPS vs. Aged:Female LPS                                       | 2.428                | 20                  | 0.2598           | ns      |
| Supplemental Table 4: CA1 Soma Volume (μm <sup>3</sup> )                |                      |                     |                  |         |
| Analysis: 3-way ANOVA                                                   | % of total variation | F (DFn, DFd)        | P value          | Summary |
| Age                                                                     | 1.983                | F (1, 22) = 0.6652  | 0.4235           | ns      |
| Sex                                                                     | 19.92                | F (1, 22) = 6.680   | 0.0169           | *       |
| LPS                                                                     | 0.842                | F (1, 22) = 0.2824  | 0.6004           | ns      |
| Age x Sex                                                               | 0.03896              | F (1, 22) = 0.01307 | 0.91             | ns      |
| Age x LPS                                                               | 7.268                | F (1, 22) = 2.438   | 0.1327           | ns      |
| Sex x LPS                                                               | 1.457                | F (1, 22) = 0.4886  | 0.4919           | ns      |
| Age x Sex x LPS                                                         | 0.5962               | F (1, 22) = 0.2000  | 0.6591           | ns      |
| Posthoc: Šídák's multiple comparisons test                              | t                    | DF                  | Adjusted P value | Summary |
| Adult:Male Saline vs. Aged:Male Saline                                  | 0.0888               | 22                  | >0.9999          | ns      |
| Adult:Male LPS vs. Aged:Male LPS                                        | 1.064                | 22                  | 0.9859           | ns      |
| Adult:Female Saline vs. Aged:Female Saline                              | 0.6299               | 22                  | 0.9999           | ns      |
| Adult:Female LPS vs. Aged:Female LPS                                    | 1.41                 | 22                  | 0.8968           | ns      |
| Adult:Male Saline vs. Adult:Male LPS                                    | 1.22                 | 22                  | 0.96             | ns      |
| Adult:Female Saline vs. Adult:Female LPS                                | 0.9581               | 22                  | 0.9941           | ns      |
| Aged:Male Saline vs. Aged:Male LPS                                      | 0.056                | 22                  | >0.9999          | ns      |
| Aged:Female Saline vs. Aged:Female LPS                                  | 1.049                | 22                  | 0.9875           | ns      |
| Adult:Male Saline vs. Adult:Female Saline                               | 1.274                | 22                  | 0.9462           | ns      |
| Adult:Male LPS vs. Adult:Female LPS                                     | 1.536                | 22                  | 0.8338           | ns      |
| Aged:Male Saline vs. Aged:Female Saline                                 | 0.5968               | 22                  | >0.9999          | ns      |
| Aged:Male LPS vs. Aged:Female LPS                                       | 1.882                | 22                  | 0.5979           | ns      |

| <b>Supplemental Table 4: CA3 IBA1+ Microglia (#/ROI)</b>                      |                             |                     |                         |                |
|-------------------------------------------------------------------------------|-----------------------------|---------------------|-------------------------|----------------|
| <b>Analysis: 3-way ANOVA</b>                                                  | <b>% of total variation</b> | <b>F (DFn, DFd)</b> | <b>P value</b>          | <b>Summary</b> |
| Age                                                                           | 43.17                       | F (1, 21) = 19.32   | 0.0003                  | ***            |
| Sex                                                                           | 0.7592                      | F (1, 21) = 0.3397  | 0.5662                  | ns             |
| LPS                                                                           | 1.339                       | F (1, 21) = 0.5993  | 0.4475                  | ns             |
| Age x Sex                                                                     | 7.226                       | F (1, 21) = 3.233   | 0.0866                  | ns             |
| Age x LPS                                                                     | 1.364                       | F (1, 21) = 0.6103  | 0.4434                  | ns             |
| Sex x LPS                                                                     | 0.6524                      | F (1, 21) = 0.2919  | 0.5947                  | ns             |
| Age x Sex x LPS                                                               | 0.5151                      | F (1, 21) = 0.2305  | 0.6361                  | ns             |
| <b>Posthoc: Šidák's multiple comparisons test</b>                             | <b>t</b>                    | <b>DF</b>           | <b>Adjusted P value</b> | <b>Summary</b> |
| Adult:Male Saline vs. Aged:Male Saline                                        | 3.424                       | 21                  | 0.0302                  | *              |
| Adult:Male LPS vs. Aged:Male LPS                                              | 2.615                       | 21                  | 0.1776                  | ns             |
| Adult:Female Saline vs. Aged:Female Saline                                    | 1.423                       | 21                  | 0.8922                  | ns             |
| Adult:Female LPS vs. Aged:Female LPS                                          | 1.218                       | 21                  | 0.961                   | ns             |
| Adult:Male Saline vs. Adult:Male LPS                                          | 0.7341                      | 21                  | 0.9995                  | ns             |
| Adult:Female Saline vs. Adult:Female LPS                                      | 0.8568                      | 21                  | 0.9979                  | ns             |
| Aged:Male Saline vs. Aged:Male LPS                                            | 0.5045                      | 21                  | >0.9999                 | ns             |
| Aged:Female Saline vs. Aged:Female LPS                                        | 0.4975                      | 21                  | >0.9999                 | ns             |
| Adult:Male Saline vs. Adult:Female Saline                                     | 0.5671                      | 21                  | >0.9999                 | ns             |
| Adult:Male LPS vs. Adult:Female LPS                                           | 0.6764                      | 21                  | 0.9998                  | ns             |
| Aged:Male Saline vs. Aged:Female Saline                                       | 1.562                       | 21                  | 0.8201                  | ns             |
| Aged:Male LPS vs. Aged:Female LPS                                             | 0.7215                      | 21                  | 0.9996                  | ns             |
| <b>Supplemental Table 4: CA3 IBA1+ Staining Area (x10<sup>6</sup> voxels)</b> |                             |                     |                         |                |
| <b>Analysis: 3-way ANOVA</b>                                                  | <b>% of total variation</b> | <b>F (DFn, DFd)</b> | <b>P value</b>          | <b>Summary</b> |
| Age                                                                           | 10.85                       | F (1, 21) = 3.853   | 0.063                   | ns             |
| Sex                                                                           | 0.7231                      | F (1, 21) = 0.2568  | 0.6176                  | ns             |
| LPS                                                                           | 3.193                       | F (1, 21) = 1.134   | 0.299                   | ns             |
| Age x Sex                                                                     | 1.836                       | F (1, 21) = 0.6523  | 0.4283                  | ns             |
| Age x LPS                                                                     | 2.062                       | F (1, 21) = 0.7325  | 0.4017                  | ns             |
| Sex x LPS                                                                     | 14.55                       | F (1, 21) = 5.167   | 0.0336                  | *              |
| Age x Sex x LPS                                                               | 4.648                       | F (1, 21) = 1.651   | 0.2128                  | ns             |
| <b>Posthoc: Šidák's multiple comparisons test</b>                             | <b>t</b>                    | <b>DF</b>           | <b>Adjusted P value</b> | <b>Summary</b> |
| Adult:Male Saline vs. Aged:Male Saline                                        | 0.3339                      | 21                  | >0.9999                 | ns             |
| Adult:Male LPS vs. Aged:Male LPS                                              | 2.411                       | 21                  | 0.2632                  | ns             |
| Adult:Female Saline vs. Aged:Female Saline                                    | 0.7778                      | 21                  | 0.9992                  | ns             |
| Adult:Female LPS vs. Aged:Female LPS                                          | 0.3565                      | 21                  | >0.9999                 | ns             |
| Adult:Male Saline vs. Adult:Male LPS                                          | 0.5878                      | 21                  | >0.9999                 | ns             |
| Adult:Female Saline vs. Adult:Female LPS                                      | 0.3825                      | 21                  | >0.9999                 | ns             |
| Aged:Male Saline vs. Aged:Male LPS                                            | 2.906                       | 21                  | 0.0969                  | ns             |
| Aged:Female Saline vs. Aged:Female LPS                                        | 0.8038                      | 21                  | 0.9988                  | ns             |
| Adult:Male Saline vs. Adult:Female Saline                                     | 1.221                       | 21                  | 0.9602                  | ns             |
| Adult:Male LPS vs. Adult:Female LPS                                           | 0.1499                      | 21                  | >0.9999                 | ns             |
| Aged:Male Saline vs. Aged:Female Saline                                       | 1.599                       | 21                  | 0.7978                  | ns             |
| Aged:Male LPS vs. Aged:Female LPS                                             | 2.046                       | 21                  | 0.4826                  | ns             |
| <b>Supplemental Table 4: CA3 Soma Volume (μm<sup>3</sup>)</b>                 |                             |                     |                         |                |
| <b>Analysis: 3-way ANOVA</b>                                                  | <b>% of total variation</b> | <b>F (DFn, DFd)</b> | <b>P value</b>          | <b>Summary</b> |
| Age                                                                           | 0.06652                     | F (1, 22) = 0.02692 | 0.8712                  | ns             |
| Sex                                                                           | 25.14                       | F (1, 22) = 10.18   | 0.0042                  | **             |
| LPS                                                                           | 3.016                       | F (1, 22) = 1.221   | 0.2811                  | ns             |
| Age x Sex                                                                     | 1.283                       | F (1, 22) = 0.5192  | 0.4788                  | ns             |
| Age x LPS                                                                     | 9.577                       | F (1, 22) = 3.876   | 0.0617                  | ns             |
| Sex x LPS                                                                     | 1.38                        | F (1, 22) = 0.5585  | 0.4628                  | ns             |
| Age x Sex x LPS                                                               | 2.485                       | F (1, 22) = 1.006   | 0.3268                  | ns             |
| <b>Posthoc: Šidák's multiple comparisons test</b>                             | <b>t</b>                    | <b>DF</b>           | <b>Adjusted P value</b> | <b>Summary</b> |
| Adult:Male Saline vs. Aged:Male Saline                                        | 0.7335                      | 22                  | 0.9995                  | 0.9995         |
| Adult:Male LPS vs. Aged:Male LPS                                              | 0.213                       | 22                  | >0.9999                 | >0.9999        |
| Adult:Female Saline vs. Aged:Female Saline                                    | 1.006                       | 22                  | 0.9911                  | 0.9911         |
| Adult:Female LPS vs. Aged:Female LPS                                          | 2.007                       | 22                  | 0.5068                  | 0.5068         |
| Adult:Male Saline vs. Adult:Male LPS                                          | 0.6377                      | 22                  | 0.9999                  | 0.9999         |
| Adult:Female Saline vs. Adult:Female LPS                                      | 2.51                        | 22                  | 0.2144                  | 0.2144         |
| Aged:Male Saline vs. Aged:Male LPS                                            | 0.3165                      | 22                  | >0.9999                 | >0.9999        |
| Aged:Female Saline vs. Aged:Female LPS                                        | 0.5394                      | 22                  | >0.9999                 | >0.9999        |
| Adult:Male Saline vs. Adult:Female Saline                                     | 2.033                       | 22                  | 0.4882                  | 0.4882         |
| Adult:Male LPS vs. Adult:Female LPS                                           | 0.3742                      | 22                  | >0.9999                 | >0.9999        |
| Aged:Male Saline vs. Aged:Female Saline                                       | 1.761                       | 22                  | 0.6866                  | 0.6866         |
| Aged:Male LPS vs. Aged:Female LPS                                             | 2.168                       | 22                  | 0.3967                  | 0.3967         |
