# Supplementary material
Source: PubMed Central journal article supplement (PMC10790303)
Supplement: NIHMS1957616-supplement-Table_S6.pdf [file NIHMS1957616-supplement-Table_S6.pdf]

| <b>Figure 4B: Microglia <i>I1b</i> mRNA</b>           |                             |                      |                |                |
|-------------------------------------------------------|-----------------------------|----------------------|----------------|----------------|
| <b>Analysis: 3-way ANOVA</b>                          | <b>% of total variation</b> | <b>F (DFn, DFd)</b>  | <b>P value</b> | <b>Summary</b> |
| Dose                                                  | 70.92                       | F (3, 76) = 75.11    | <0.0001        | ****           |
| Sex                                                   | 1.137                       | F (1, 76) = 3.612    | 0.0611         | ns             |
| Age                                                   | 0.4542                      | F (1, 76) = 1.443    | 0.2334         | ns             |
| Dose x Sex                                            | 0.2808                      | F (3, 76) = 0.2974   | 0.8272         | ns             |
| Dose x Age                                            | 0.2745                      | F (3, 76) = 0.2907   | 0.832          | ns             |
| Sex x Age                                             | 1.595                       | F (1, 76) = 5.067    | 0.0273         | *              |
| Dose x Sex x Age                                      | 1.681                       | F (3, 76) = 1.780    | 0.158          | ns             |
| <b>Figure 4B: Microglia <i>I1b</i> mRNA - males</b>   |                             |                      |                |                |
| <b>Analysis: 2-way ANOVA</b>                          | <b>% of total variation</b> | <b>F (DFn, DFd)</b>  | <b>P value</b> | <b>Summary</b> |
| Interaction                                           | 3.298                       | F (3, 36) = 2.173    | 0.1081         | ns             |
| Age                                                   | 5.024                       | F (1, 36) = 9.930    | 0.0033         | **             |
| Dose                                                  | 75.46                       | F (3, 36) = 49.72    | <0.0001        | ****           |
| <b>Figure 4B: Microglia <i>I1b</i> mRNA - females</b> |                             |                      |                |                |
| <b>Analysis: 2-way ANOVA</b>                          | <b>% of total variation</b> | <b>F (DFn, DFd)</b>  | <b>P value</b> | <b>Summary</b> |
| Interaction                                           | 0.7461                      | F (3, 40) = 0.3446   | 0.7932         | ns             |
| Age                                                   | 0.308                       | F (1, 40) = 0.4267   | 0.5173         | ns             |
| Dose                                                  | 70.08                       | F (3, 40) = 32.36    | <0.0001        | ****           |
| <b>Figure 4C: Microglia <i>I6</i> mRNA</b>            |                             |                      |                |                |
| <b>Analysis: 3-way ANOVA</b>                          | <b>% of total variation</b> | <b>F (DFn, DFd)</b>  | <b>P value</b> | <b>Summary</b> |
| Dose                                                  | 68.61                       | F (3, 72) = 66.65    | <0.0001        | ****           |
| Sex                                                   | 0.3265                      | F (1, 72) = 0.9515   | 0.3326         | ns             |
| Age                                                   | 0.00261                     | F (1, 72) = 0.007606 | 0.9307         | ns             |
| Dose x Sex                                            | 0.6946                      | F (3, 72) = 0.6748   | 0.5703         | ns             |
| Dose x Age                                            | 0.07826                     | F (3, 72) = 0.07602  | 0.9727         | ns             |
| Sex x Age                                             | 2.624                       | F (1, 72) = 7.648    | 0.0072         | **             |
| Dose x Sex x Age                                      | 2.515                       | F (3, 72) = 2.443    | 0.0711         | ns             |
| <b>Figure 4C: Microglia <i>I6</i> mRNA - males</b>    |                             |                      |                |                |
| <b>Analysis: 2-way ANOVA</b>                          | <b>% of total variation</b> | <b>F (DFn, DFd)</b>  | <b>P value</b> | <b>Summary</b> |
| Interaction                                           | 3.372                       | F (3, 32) = 2.859    | 0.0523         | ns             |
| Age                                                   | 2.814                       | F (1, 32) = 7.159    | 0.0117         | *              |
| Dose                                                  | 81.23                       | F (3, 32) = 68.88    | <0.0001        | ****           |
| <b>Figure 4C: Microglia <i>I6</i> mRNA - females</b>  |                             |                      |                |                |
| <b>Analysis: 2-way ANOVA</b>                          | <b>% of total variation</b> | <b>F (DFn, DFd)</b>  | <b>P value</b> | <b>Summary</b> |
| Interaction                                           | 2.064                       | F (3, 40) = 0.8341   | 0.4831         | ns             |
| Age                                                   | 2.577                       | F (1, 40) = 3.124    | 0.0848         | ns             |
| Dose                                                  | 62.36                       | F (3, 40) = 25.20    | <0.0001        | ****           |

| <b>Figure 4D: Microglia <i>Tnfa</i> mRNA</b>           |                             |                     |                |                |
|--------------------------------------------------------|-----------------------------|---------------------|----------------|----------------|
| <b>Analysis: 3-way ANOVA</b>                           | <b>% of total variation</b> | <b>F (DFn, DFd)</b> | <b>P value</b> | <b>Summary</b> |
| Dose                                                   | 79.34                       | F (3, 72) = 115.3   | <0.0001        | ****           |
| Sex                                                    | 0.2619                      | F (1, 72) = 1.142   | 0.2888         | ns             |
| Age                                                    | 0.03681                     | F (1, 72) = 0.1606  | 0.6898         | ns             |
| Dose x Sex                                             | 0.2085                      | F (3, 72) = 0.3031  | 0.823          | ns             |
| Dose x Age                                             | 0.2678                      | F (3, 72) = 0.3893  | 0.7611         | ns             |
| Sex x Age                                              | 2.839                       | F (1, 72) = 12.38   | 0.0008         | ***            |
| Dose x Sex x Age                                       | 2.424                       | F (3, 72) = 3.525   | 0.0191         | *              |
| <b>Figure 4D: Microglia <i>Tnfa</i> mRNA - males</b>   |                             |                     |                |                |
| <b>Analysis: 2-way ANOVA</b>                           | <b>% of total variation</b> | <b>F (DFn, DFd)</b> | <b>P value</b> | <b>Summary</b> |
| Interaction                                            | 1.61                        | F (3, 36) = 1.148   | 0.3428         | ns             |
| Age                                                    | 2.477                       | F (1, 36) = 5.303   | 0.0272         | *              |
| Dose                                                   | 80.48                       | F (3, 36) = 57.42   | <0.0001        | ****           |
| <b>Figure 4D: Microglia <i>Tnfa</i> mRNA - females</b> |                             |                     |                |                |
| <b>Analysis: 2-way ANOVA</b>                           | <b>% of total variation</b> | <b>F (DFn, DFd)</b> | <b>P value</b> | <b>Summary</b> |
| Interaction                                            | 3.593                       | F (3, 36) = 2.641   | 0.0641         | ns             |
| Age                                                    | 3.215                       | F (1, 36) = 7.090   | 0.0115         | *              |
| Dose                                                   | 79.14                       | F (3, 36) = 58.17   | <0.0001        | ****           |
