# Supplementary material
Source: PubMed Central journal article supplement (PMC10790303)
Supplement: NIHMS1957616-supplement-Table_S7.pdf [file NIHMS1957616-supplement-Table_S7.pdf]

| Figure 5A: <i>Aif1</i> mRNA expression     |                      |                    |                  |         |
|--------------------------------------------|----------------------|--------------------|------------------|---------|
| Analysis: 2-way ANOVA                      | % of total variation | F (DFn, DFd)       | P value          | Summary |
| Interaction                                | 3.248                | F (1, 12) = 1.220  | 0.291            | ns      |
| Age                                        | 29.95                | F (1, 12) = 11.25  | 0.0057           | **      |
| Sex                                        | 28.07                | F (1, 12) = 10.55  | 0.007            | **      |
| Posthoc: Tukey's multiple comparisons test | q                    | DF                 | Adjusted P value | Summary |
| Adult:Male vs. Adult:Female                | 4.424                | 12                 | 0.0379           | *       |
| Adult:Male vs. Aged:Male                   | 4.197                | 12                 | 0.0501           | ns      |
| Adult:Male vs. Aged:Female                 | 7.074                | 12                 | 0.0015           | **      |
| Adult:Female vs. Aged:Male                 | 0.1006               | 12                 | 0.9999           | ns      |
| Adult:Female vs. Aged:Female               | 2.411                | 12                 | 0.3631           | ns      |
| Aged:Male vs. Aged:Female                  | 2.109                | 12                 | 0.4718           | ns      |
| Figure 5A: <i>Cd68</i> mRNA expression     |                      |                    |                  |         |
| Analysis: 2-way ANOVA                      | % of total variation | F (DFn, DFd)       | P value          | Summary |
| Interaction                                | 1.274                | F (1, 12) = 0.6487 | 0.4362           | ns      |
| Age                                        | 63.87                | F (1, 12) = 32.52  | <0.0001          | ****    |
| Sex                                        | 3.152                | F (1, 12) = 1.605  | 0.2293           | ns      |
| Posthoc: Tukey's multiple comparisons test | q                    | DF                 | Adjusted P value | Summary |
| Adult:Male vs. Adult:Female                | 0.469                | 12                 | 0.9868           | ns      |
| Adult:Male vs. Aged:Male                   | 4.609                | 12                 | 0.0302           | *       |
| Adult:Male vs. Aged:Female                 | 7.468                | 12                 | 0.001            | ***     |
| Adult:Female vs. Aged:Male                 | 4.175                | 12                 | 0.0515           | ns      |
| Adult:Female vs. Aged:Female               | 6.973                | 12                 | 0.0017           | **      |
| Aged:Male vs. Aged:Female                  | 2.04                 | 12                 | 0.4989           | ns      |
| Figure 5A: <i>Ciita</i> mRNA expression    |                      |                    |                  |         |
| Analysis: 2-way ANOVA                      | % of total variation | F (DFn, DFd)       | P value          | Summary |
| Interaction                                | 2.564                | F (1, 12) = 1.756  | 0.2097           | ns      |
| Age                                        | 71.55                | F (1, 12) = 49.02  | <0.0001          | ****    |
| Sex                                        | 0.6766               | F (1, 12) = 0.4636 | 0.5089           | ns      |
| Posthoc: Tukey's multiple comparisons test | q                    | DF                 | Adjusted P value | Summary |
| Adult:Male vs. Adult:Female                | 0.6551               | 12                 | 0.9657           | ns      |
| Adult:Male vs. Aged:Male                   | 5.342                | 12                 | 0.0122           | *       |
| Adult:Male vs. Aged:Female                 | 8.232                | 12                 | 0.0004           | ***     |
| Adult:Female vs. Aged:Male                 | 5.949                | 12                 | 0.0058           | **      |
| Adult:Female vs. Aged:Female               | 8.922                | 12                 | 0.0002           | ***     |
| Aged:Male vs. Aged:Female                  | 1.975                | 12                 | 0.5248           | ns      |
| Figure 5A: <i>Cx3c11</i> mRNA expression   |                      |                    |                  |         |
| Analysis: 2-way ANOVA                      | % of total variation | F (DFn, DFd)       | P value          | Summary |
| Interaction                                | 17.33                | F (1, 12) = 6.126  | 0.0292           | *       |
| Age                                        | 1.633                | F (1, 12) = 0.5771 | 0.4621           | ns      |
| Sex                                        | 50.53                | F (1, 12) = 17.86  | 0.0012           | **      |
| Posthoc: Tukey's multiple comparisons test | q                    | DF                 | Adjusted P value | Summary |
| Adult:Male vs. Adult:Female                | 1.78                 | 12                 | 0.6042           | ns      |
| Adult:Male vs. Aged:Male                   | 3.044                | 12                 | 0.1919           | ns      |
| Adult:Male vs. Aged:Female                 | 3.714                | 12                 | 0.0896           | ns      |
| Adult:Female vs. Aged:Male                 | 4.692                | 12                 | 0.0272           | *       |
| Adult:Female vs. Aged:Female               | 1.838                | 12                 | 0.5802           | ns      |
| Aged:Male vs. Aged:Female                  | 6.595                | 12                 | 0.0027           | **      |
| Figure 5A: <i>Cx3cr1</i> mRNA expression   |                      |                    |                  |         |
| Analysis: 2-way ANOVA                      | % of total variation | F (DFn, DFd)       | P value          | Summary |
| Interaction                                | 15.23                | F (1, 12) = 5.259  | 0.0407           | *       |
| Age                                        | 12.43                | F (1, 12) = 4.292  | 0.0605           | ns      |
| Sex                                        | 28.68                | F (1, 12) = 9.905  | 0.0084           | **      |
| Posthoc: Tukey's multiple comparisons test | q                    | DF                 | Adjusted P value | Summary |
| Adult:Male vs. Adult:Female                | 0.8681               | 12                 | 0.9257           | ns      |
| Adult:Male vs. Aged:Male                   | 0.2084               | 12                 | 0.9988           | ns      |
| Adult:Male vs. Aged:Female                 | 5.592                | 12                 | 0.0089           | **      |
| Adult:Female vs. Aged:Male                 | 1.012                | 12                 | 0.889            | ns      |
| Adult:Female vs. Aged:Female               | 4.677                | 12                 | 0.0277           | *       |
| Aged:Male vs. Aged:Female                  | 5.355                | 12                 | 0.012            | *       |

| Figure 5A: <i>Tlr4</i> mRNA expression     |                      |                       |                  |         |
|--------------------------------------------|----------------------|-----------------------|------------------|---------|
| Analysis: 2-way ANOVA                      | % of total variation | F (DFn, DFd)          | P value          | Summary |
| Interaction                                | 0.8179               | F (1, 12) = 0.3305    | 0.576            | ns      |
| Age                                        | 47.24                | F (1, 12) = 19.08     | 0.0009           | ***     |
| Sex                                        | 12.63                | F (1, 12) = 5.101     | 0.0433           | *       |
| Posthoc: Tukey's multiple comparisons test | q                    | DF                    | Adjusted P value | Summary |
| Adult:Male vs. Adult:Female                | 1.712                | 12                    | 0.6323           | ns      |
| Adult:Male vs. Aged:Male                   | 3.57                 | 12                    | 0.1061           | ns      |
| Adult:Male vs. Aged:Female                 | 7.101                | 12                    | 0.0015           | **      |
| Adult:Female vs. Aged:Male                 | 1.986                | 12                    | 0.5203           | ns      |
| Adult:Female vs. Aged:Female               | 5.297                | 12                    | 0.0129           | *       |
| Aged:Male vs. Aged:Female                  | 2.789                | 12                    | 0.2512           | ns      |
| Figure 5A: <i>Tmem119</i> mRNA expression  |                      |                       |                  |         |
| Analysis: 2-way ANOVA                      | % of total variation | F (DFn, DFd)          | P value          | Summary |
| Interaction                                | 0.000779             | F (1, 12) = 0.0001962 | 0.9891           | ns      |
| Age                                        | 18.88                | F (1, 12) = 4.755     | 0.0498           | *       |
| Sex                                        | 26.57                | F (1, 12) = 6.693     | 0.0238           | *       |
| Posthoc: Tukey's multiple comparisons test | q                    | DF                    | Adjusted P value | Summary |
| Adult:Male vs. Adult:Female                | 2.616                | 12                    | 0.2989           | ns      |
| Adult:Male vs. Aged:Male                   | 2.039                | 12                    | 0.4992           | ns      |
| Adult:Male vs. Aged:Female                 | 5.109                | 12                    | 0.0163           | *       |
| Adult:Female vs. Aged:Male                 | 0.3825               | 12                    | 0.9927           | ns      |
| Adult:Female vs. Aged:Female               | 2.352                | 12                    | 0.3831           | ns      |
| Aged:Male vs. Aged:Female                  | 2.56                 | 12                    | 0.3154           | ns      |
| Figure 5B: <i>Cd3</i> mRNA expression      |                      |                       |                  |         |
| Analysis: 2-way ANOVA                      | % of total variation | F (DFn, DFd)          | P value          | Summary |
| Interaction                                | 16.45                | F (1, 12) = 11.17     | 0.0059           | **      |
| Age                                        | 30.89                | F (1, 12) = 20.97     | 0.0006           | ***     |
| Sex                                        | 21.44                | F (1, 12) = 14.56     | 0.0025           | **      |
| Posthoc: Tukey's multiple comparisons test | q                    | DF                    | Adjusted P value | Summary |
| Adult:Male vs. Adult:Female                | 0.4812               | 12                    | 0.9858           | ns      |
| Adult:Male vs. Aged:Male                   | 1.165                | 12                    | 0.8424           | ns      |
| Adult:Male vs. Aged:Female                 | 8.995                | 12                    | 0.0002           | ***     |
| Adult:Female vs. Aged:Male                 | 0.7191               | 12                    | 0.9555           | ns      |
| Adult:Female vs. Aged:Female               | 8.488                | 12                    | 0.0003           | ***     |
| Aged:Male vs. Aged:Female                  | 7.044                | 12                    | 0.0016           | **      |
| Figure 5B: <i>Cd4</i> mRNA expression      |                      |                       |                  |         |
| Analysis: 2-way ANOVA                      | % of total variation | F (DFn, DFd)          | P value          | Summary |
| Interaction                                | 0.7447               | F (1, 12) = 0.9592    | 0.3467           | ns      |
| Age                                        | 86.01                | F (1, 12) = 110.8     | <0.0001          | ****    |
| Sex                                        | 0.3232               | F (1, 12) = 0.4162    | 0.531            | ns      |
| Posthoc: Tukey's multiple comparisons test | q                    | DF                    | Adjusted P value | Summary |
| Adult:Male vs. Adult:Female                | 1.651                | 12                    | 0.6571           | ns      |
| Adult:Male vs. Aged:Male                   | 8.984                | 12                    | 0.0002           | ***     |
| Adult:Male vs. Aged:Female                 | 10.59                | 12                    | <0.0001          | ****    |
| Adult:Female vs. Aged:Male                 | 10.51                | 12                    | <0.0001          | ****    |
| Adult:Female vs. Aged:Female               | 12.33                | 12                    | <0.0001          | ****    |
| Aged:Male vs. Aged:Female                  | 0.329                | 12                    | 0.9953           | ns      |
| Figure 5B: <i>Cd8</i> mRNA expression      |                      |                       |                  |         |
| Analysis: 2-way ANOVA                      | % of total variation | F (DFn, DFd)          | P value          | Summary |
| Interaction                                | 15.23                | F (1, 12) = 5.259     | 0.0407           | *       |
| Age                                        | 12.43                | F (1, 12) = 4.292     | 0.0605           | ns      |
| Sex                                        | 28.68                | F (1, 12) = 9.905     | 0.0084           | **      |
| Posthoc: Tukey's multiple comparisons test | q                    | DF                    | Adjusted P value | Summary |
| Adult:Male vs. Adult:Female                | 0.8681               | 12                    | 0.9257           | ns      |
| Adult:Male vs. Aged:Male                   | 0.2084               | 12                    | 0.9988           | ns      |
| Adult:Male vs. Aged:Female                 | 5.592                | 12                    | 0.0089           | **      |
| Adult:Female vs. Aged:Male                 | 1.012                | 12                    | 0.889            | ns      |
| Adult:Female vs. Aged:Female               | 4.677                | 12                    | 0.0277           | *       |
| Aged:Male vs. Aged:Female                  | 5.355                | 12                    | 0.012            | *       |

| Figure 5B: <i>Irf10</i> mRNA expression    |                      |                      |                  |         |
|--------------------------------------------|----------------------|----------------------|------------------|---------|
| Analysis: 2-way ANOVA                      | % of total variation | F (DFn, DFd)         | P value          | Summary |
| Interaction                                | 6.101                | F (1, 10) = 1.266    | 0.2868           | ns      |
| Age                                        | 41.14                | F (1, 10) = 8.536    | 0.0153           | *       |
| Sex                                        | 9.198                | F (1, 10) = 1.909    | 0.1972           | ns      |
| Posthoc: Tukey's multiple comparisons test |                      |                      |                  |         |
|                                            | q                    | DF                   | Adjusted P value | Summary |
| Adult:Male vs. Adult:Female                | 2.507                | 10                   | 0.3399           | ns      |
| Adult:Male vs. Aged:Male                   | 1.797                | 10                   | 0.6001           | ns      |
| Adult:Male vs. Aged:Female                 | 1.664                | 10                   | 0.6541           | ns      |
| Adult:Female vs. Aged:Male                 | 4.025                | 10                   | 0.0701           | ns      |
| Adult:Female vs. Aged:Female               | 4.047                | 10                   | 0.0684           | ns      |
| Aged:Male vs. Aged:Female                  | 0.2564               | 10                   | 0.9977           | ns      |
| Figure 5B: <i>Irfng</i> mRNA expression    |                      |                      |                  |         |
| Analysis: 2-way ANOVA                      | % of total variation | F (DFn, DFd)         | P value          | Summary |
| Interaction                                | 11.06                | F (1, 12) = 2.150    | 0.1683           | ns      |
| Age                                        | 0.3451               | F (1, 12) = 0.06709  | 0.8              | ns      |
| Sex                                        | 28.07                | F (1, 12) = 5.457    | 0.0377           | *       |
| Posthoc: Tukey's multiple comparisons test |                      |                      |                  |         |
|                                            | q                    | DF                   | Adjusted P value | Summary |
| Adult:Male vs. Adult:Female                | 0.8842               | 12                   | 0.922            | ns      |
| Adult:Male vs. Aged:Male                   | 1.624                | 12                   | 0.6685           | ns      |
| Adult:Male vs. Aged:Female                 | 2.226                | 12                   | 0.428            | ns      |
| Adult:Female vs. Aged:Male                 | 2.442                | 12                   | 0.3526           | ns      |
| Adult:Female vs. Aged:Female               | 1.294                | 12                   | 0.7976           | ns      |
| Aged:Male vs. Aged:Female                  | 3.742                | 12                   | 0.0866           | ns      |
| Figure 5B: <i>Foxp3</i> mRNA expression    |                      |                      |                  |         |
| Analysis: 2-way ANOVA                      | % of total variation | F (DFn, DFd)         | P value          | Summary |
| Interaction                                | 3.824                | F (1, 11) = 0.4795   | 0.503            | ns      |
| Age                                        | 0.008984             | F (1, 11) = 0.001127 | 0.9738           | ns      |
| Sex                                        | 9.243                | F (1, 11) = 1.159    | 0.3047           | ns      |
