# Supplementary material
Source: PubMed Central journal article supplement (PMC10790303)
Supplement: NIHMS1957616-supplement-Table_S8.pdf [file NIHMS1957616-supplement-Table_S8.pdf]

**Figure 7A: Brain T Cells**

| <b>Analysis: 3-way ANOVA</b> | <b>% of total variation</b> | <b>F (DFn, DFd)</b> | <b>P value</b> | <b>Summary</b> |
|------------------------------|-----------------------------|---------------------|----------------|----------------|
| Age                          | 29.66                       | F (1, 57) = 28.10   | <0.0001        | ****           |
| Sex                          | 4.328                       | F (1, 57) = 4.101   | 0.0475         | *              |
| LPS                          | 0.6993                      | F (1, 57) = 0.6627  | 0.419          | ns             |
| Age x Sex                    | 2.836                       | F (1, 57) = 2.687   | 0.1067         | ns             |
| Age x LPS                    | 0.6173                      | F (1, 57) = 0.5849  | 0.4475         | ns             |
| Sex x LPS                    | 0.1022                      | F (1, 57) = 0.09688 | 0.7567         | ns             |
| Age x Sex x LPS              | 0.04911                     | F (1, 57) = 0.04654 | 0.83           | ns             |

  

| <b>Posthoc: Šidák's multiple comparisons test</b> | <b>t</b> | <b>DF</b> | <b>Adjusted P value</b> | <b>Summary</b> |
|---------------------------------------------------|----------|-----------|-------------------------|----------------|
| Adult:Male - Saline vs. Aged:Male - Saline        | 2.107    | 57        | 0.3835                  | ns             |
| Adult:Male - LPS vs. Aged:Male - LPS              | 1.593    | 57        | 0.7744                  | ns             |
| Adult:Female - Saline vs. Aged:Female - Saline    | 3.964    | 57        | 0.0025                  | **             |
| Adult:Female - LPS vs. Aged:Female - LPS          | 2.91     | 57        | 0.06                    | ns             |
| Adult:Male - Saline vs. Adult:Male - LPS          | 0.2719   | 57        | >0.9999                 | ns             |
| Adult:Female - Saline vs. Adult:Female - LPS      | 0.2165   | 57        | >0.9999                 | ns             |
| Aged:Male - Saline vs. Aged:Male - LPS            | 0.919    | 57        | 0.9955                  | ns             |
| Aged:Female - Saline vs. Aged:Female - LPS        | 0.8141   | 57        | 0.9985                  | ns             |
| Adult:Male - Saline vs. Adult:Female - Saline     | 0.06652  | 57        | >0.9999                 | ns             |
| Adult:Male - LPS vs. Adult:Female - LPS           | 0.4138   | 57        | >0.9999                 | ns             |
| Aged:Male - Saline vs. Aged:Female - Saline       | 1.909    | 57        | 0.5318                  | ns             |
| Aged:Male - LPS vs. Aged:Female - LPS             | 2.12     | 57        | 0.3746                  | ns             |

**Figure 7B: Brain CD8+ T Cells**

| <b>Analysis: 3-way ANOVA</b> | <b>% of total variation</b> | <b>F (DFn, DFd)</b> | <b>P value</b> | <b>Summary</b> |
|------------------------------|-----------------------------|---------------------|----------------|----------------|
| Age                          | 25.62                       | F (1, 57) = 24.57   | <0.0001        | ****           |
| Sex                          | 6.949                       | F (1, 57) = 6.665   | 0.0124         | *              |
| LPS                          | 0.3393                      | F (1, 57) = 0.3254  | 0.5706         | ns             |
| Age x Sex                    | 4.204                       | F (1, 57) = 4.032   | 0.0494         | *              |
| Age x LPS                    | 0.9474                      | F (1, 57) = 0.9088  | 0.3445         | ns             |
| Sex x LPS                    | 0.05993                     | F (1, 57) = 0.05748 | 0.8114         | ns             |
| Age x Sex x LPS              | 0.02045                     | F (1, 57) = 0.01962 | 0.8891         | ns             |

  

| <b>Posthoc: Šidák's multiple comparisons test</b> | <b>t</b> | <b>DF</b> | <b>Adjusted P value</b> | <b>Summary</b> |
|---------------------------------------------------|----------|-----------|-------------------------|----------------|
| Adult:Male - Saline vs. Aged:Male - Saline        | 1.883    | 57        | 0.5527                  | ns             |
| Adult:Male - LPS vs. Aged:Male - LPS              | 1.093    | 57        | 0.9803                  | ns             |
| Adult:Female - Saline vs. Aged:Female - Saline    | 4.032    | 57        | 0.002                   | **             |
| Adult:Female - LPS vs. Aged:Female - LPS          | 2.867    | 57        | 0.0673                  | ns             |
| Adult:Male - Saline vs. Adult:Male - LPS          | 0.001425 | 57        | >0.9999                 | ns             |
| Adult:Female - Saline vs. Adult:Female - LPS      | 0.3457   | 57        | >0.9999                 | ns             |
| Aged:Male - Saline vs. Aged:Male - LPS            | 0.891    | 57        | 0.9966                  | ns             |
| Aged:Female - Saline vs. Aged:Female - LPS        | 0.7816   | 57        | 0.999                   | ns             |
| Adult:Male - Saline vs. Adult:Female - Saline     | 0.09146  | 57        | >0.9999                 | ns             |
| Adult:Male - LPS vs. Adult:Female - LPS           | 0.4322   | 57        | >0.9999                 | ns             |
| Aged:Male - Saline vs. Aged:Female - Saline       | 2.402    | 57        | 0.2114                  | ns             |
| Aged:Male - LPS vs. Aged:Female - LPS             | 2.644    | 57        | 0.1196                  | ns             |

**Figure 7C: Brain CD4+ T Cells**

| <b>Analysis: 3-way ANOVA</b> | <b>% of total variation</b> | <b>F (DFn, DFd)</b> | <b>P value</b> | <b>Summary</b> |
|------------------------------|-----------------------------|---------------------|----------------|----------------|
| Age                          | 23.52                       | F (1, 57) = 19.14   | <0.0001        | ****           |
| Sex                          | 2.081                       | F (1, 57) = 1.694   | 0.1983         | ns             |
| LPS                          | 0.8382                      | F (1, 57) = 0.6823  | 0.4123         | ns             |
| Age x Sex                    | 1.962                       | F (1, 57) = 1.597   | 0.2114         | ns             |
| Age x LPS                    | 0.4244                      | F (1, 57) = 0.3454  | 0.559          | ns             |
| Sex x LPS                    | 0.1282                      | F (1, 57) = 0.1044  | 0.7478         | ns             |
| Age x Sex x LPS              | 0.1874                      | F (1, 57) = 0.1526  | 0.6976         | ns             |

  

| <b>Posthoc: Šidák's multiple comparisons test</b> | <b>t</b> | <b>DF</b> | <b>Adjusted P value</b> | <b>Summary</b> |
|---------------------------------------------------|----------|-----------|-------------------------|----------------|
| Adult:Male - Saline vs. Aged:Male - Saline        | 1.656    | 57        | 0.7297                  | ns             |
| Adult:Male - LPS vs. Aged:Male - LPS              | 1.491    | 57        | 0.8394                  | ns             |
| Adult:Female - Saline vs. Aged:Female - Saline    | 3.311    | 57        | 0.0192                  | *              |
| Adult:Female - LPS vs. Aged:Female - LPS          | 2.276    | 57        | 0.2765                  | ns             |
| Adult:Male - Saline vs. Adult:Male - LPS          | 0.4491   | 57        | >0.9999                 | ns             |
| Adult:Female - Saline vs. Adult:Female - LPS      | 0.2155   | 57        | >0.9999                 | ns             |
| Aged:Male - Saline vs. Aged:Male - LPS            | 0.7388   | 57        | 0.9994                  | ns             |
| Aged:Female - Saline vs. Aged:Female - LPS        | 0.813    | 57        | 0.9985                  | ns             |
| Adult:Male - Saline vs. Adult:Female - Saline     | 0.3189   | 57        | >0.9999                 | ns             |
| Adult:Male - LPS vs. Adult:Female - LPS           | 0.3406   | 57        | >0.9999                 | ns             |
| Aged:Male - Saline vs. Aged:Female - Saline       | 1.408    | 57        | 0.8842                  | ns             |
| Aged:Male - LPS vs. Aged:Female - LPS             | 1.408    | 57        | 0.8842                  | ns             |

**Figure 7C: Brain Teffs**

| <b>Analysis: 3-way ANOVA</b> | <b>% of total variation</b> | <b>F (DFn, DFd)</b> | <b>P value</b> | <b>Summary</b> |
|------------------------------|-----------------------------|---------------------|----------------|----------------|
| Age                          | 14.52                       | F (1, 57) = 12.30   | 0.0009         | ***            |
| Sex                          | 7.236                       | F (1, 57) = 6.128   | 0.0163         | *              |
| LPS                          | 1.092                       | F (1, 57) = 0.9249  | 0.3403         | ns             |
| Age x Sex                    | 6.388                       | F (1, 57) = 5.410   | 0.0236         | *              |
| Age x LPS                    | 0.3771                      | F (1, 57) = 0.3193  | 0.5742         | ns             |
| Sex x LPS                    | 0.1315                      | F (1, 57) = 0.1114  | 0.7398         | ns             |
| Age x Sex x LPS              | 0.03503                     | F (1, 57) = 0.02967 | 0.8639         | ns             |

  

| <b>Posthoc: Šidák's multiple comparisons test</b> | <b>t</b> | <b>DF</b> | <b>Adjusted P value</b> | <b>Summary</b> |
|---------------------------------------------------|----------|-----------|-------------------------|----------------|
| Adult:Male - Saline vs. Aged:Male - Saline        | 0.7875   | 57        | 0.9989                  | ns             |
| Adult:Male - LPS vs. Aged:Male - LPS              | 0.4033   | 57        | >0.9999                 | ns             |
| Adult:Female - Saline vs. Aged:Female - Saline    | 3.288    | 57        | 0.0206                  | *              |
| Adult:Female - LPS vs. Aged:Female - LPS          | 2.488    | 57        | 0.1738                  | ns             |
| Adult:Male - Saline vs. Adult:Male - LPS          | 0.4258   | 57        | >0.9999                 | ns             |
| Adult:Female - Saline vs. Adult:Female - LPS      | 0.04955  | 57        | >0.9999                 | ns             |
| Aged:Male - Saline vs. Aged:Male - LPS            | 0.9266   | 57        | 0.9951                  | ns             |
| Aged:Female - Saline vs. Aged:Female - LPS        | 0.7493   | 57        | 0.9993                  | ns             |
| Adult:Male - Saline vs. Adult:Female - Saline     | 0.1682   | 57        | >0.9999                 | ns             |
| Adult:Male - LPS vs. Adult:Female - LPS           | 0.2971   | 57        | >0.9999                 | ns             |
| Aged:Male - Saline vs. Aged:Female - Saline       | 2.482    | 57        | 0.1763                  | ns             |
| Aged:Male - LPS vs. Aged:Female - LPS             | 2.798    | 57        | 0.0808                  | ns             |

**Figure 7C: Brain Tregs**

| <b>Analysis: 3-way ANOVA</b> | <b>% of total variation</b> | <b>F (DFn, DFd)</b> | <b>P value</b> | <b>Summary</b> |
|------------------------------|-----------------------------|---------------------|----------------|----------------|
| Age                          | 6.489                       | F (1, 57) = 4.304   | 0.0426         | *              |
| Sex                          | 2.877                       | F (1, 57) = 1.908   | 0.1726         | ns             |
| LPS                          | 0.2105                      | F (1, 57) = 0.1396  | 0.71           | ns             |
| Age x Sex                    | 1.739                       | F (1, 57) = 1.154   | 0.2873         | ns             |
| Age x LPS                    | 1.311                       | F (1, 57) = 0.8695  | 0.355          | ns             |
| Sex x LPS                    | 0.2138                      | F (1, 57) = 0.1418  | 0.7079         | ns             |
| Age x Sex x LPS              | 0.1312                      | F (1, 57) = 0.08700 | 0.7691         | ns             |

  

| <b>Posthoc: Šidák's multiple comparisons test</b> | <b>t</b> | <b>DF</b> | <b>Adjusted P value</b> | <b>Summary</b> |
|---------------------------------------------------|----------|-----------|-------------------------|----------------|
| Adult:Male - Saline vs. Aged:Male - Saline        | 0.8196   | 57        | 0.9984                  | ns             |
| Adult:Male - LPS vs. Aged:Male - LPS              | 0.1857   | 57        | >0.9999                 | ns             |
| Adult:Female - Saline vs. Aged:Female - Saline    | 2.19     | 57        | 0.3286                  | ns             |
| Adult:Female - LPS vs. Aged:Female - LPS          | 0.9382   | 57        | 0.9945                  | ns             |
| Adult:Male - Saline vs. Adult:Male - LPS          | 0.05319  | 57        | >0.9999                 | ns             |
| Adult:Female - Saline vs. Adult:Female - LPS      | 0.5577   | 57        | >0.9999                 | ns             |
| Aged:Male - Saline vs. Aged:Male - LPS            | 0.7617   | 57        | 0.9992                  | ns             |
| Aged:Female - Saline vs. Aged:Female - LPS        | 0.672    | 57        | 0.9998                  | ns             |
| Adult:Male - Saline vs. Adult:Female - Saline     | 0.1719   | 57        | >0.9999                 | ns             |
| Adult:Male - LPS vs. Adult:Female - LPS           | 0.4437   | 57        | >0.9999                 | ns             |
| Aged:Male - Saline vs. Aged:Female - Saline       | 1.27     | 57        | 0.9403                  | ns             |
| Aged:Male - LPS vs. Aged:Female - LPS             | 1.431    | 57        | 0.873                   | ns             |

**Figure 7D: Meninges T Cells**

| <b>Analysis: 3-way ANOVA</b> | <b>% of total variation</b> | <b>F (DFn, DFd)</b> | <b>P value</b> | <b>Summary</b> |
|------------------------------|-----------------------------|---------------------|----------------|----------------|
| Age                          | 1.857                       | F (1, 58) = 1.545   | 0.2188         | ns             |
| Sex                          | 4.042                       | F (1, 58) = 3.364   | 0.0718         | ns             |
| LPS                          | 0.2019                      | F (1, 58) = 0.1680  | 0.6834         | ns             |
| Age x Sex                    | 4.26                        | F (1, 58) = 3.546   | 0.0647         | ns             |
| Age x LPS                    | 16.04                       | F (1, 58) = 13.35   | 0.0006         | ***            |
| Sex x LPS                    | 0.05555                     | F (1, 58) = 0.04623 | 0.8305         | ns             |
| Age x Sex x LPS              | 2.002                       | F (1, 58) = 1.666   | 0.2019         | ns             |

  

| <b>Posthoc: Šidák's multiple comparisons test</b> | <b>t</b> | <b>DF</b> | <b>Adjusted P value</b> | <b>Summary</b> |
|---------------------------------------------------|----------|-----------|-------------------------|----------------|
| Adult:Male - Saline vs. Aged:Male - Saline        | 0.8521   | 58        | 0.9977                  | ns             |
| Adult:Male - LPS vs. Aged:Male - LPS              | 1.518    | 58        | 0.8229                  | ns             |
| Adult:Female - Saline vs. Aged:Female - Saline    | 3.991    | 58        | 0.0022                  | **             |
| Adult:Female - LPS vs. Aged:Female - LPS          | 0.9196   | 58        | 0.9954                  | ns             |
| Adult:Male - Saline vs. Adult:Male - LPS          | 1.011    | 58        | 0.9896                  | ns             |
| Adult:Female - Saline vs. Adult:Female - LPS      | 2.014    | 58        | 0.4504                  | ns             |
| Aged:Male - Saline vs. Aged:Male - LPS            | 1.387    | 58        | 0.8941                  | ns             |
| Aged:Female - Saline vs. Aged:Female - LPS        | 3.021    | 58        | 0.044                   | *              |
| Adult:Male - Saline vs. Adult:Female - Saline     | 0.5243   | 58        | >0.9999                 | ns             |
| Adult:Male - LPS vs. Adult:Female - LPS           | 0.4788   | 58        | >0.9999                 | ns             |
| Aged:Male - Saline vs. Aged:Female - Saline       | 2.761    | 58        | 0.0886                  | ns             |
| Aged:Male - LPS vs. Aged:Female - LPS             | 1.232    | 58        | 0.9515                  | ns             |

**Figure 7E: Meninges CD8+ T Cells**

| <b>Analysis: 3-way ANOVA</b> | <b>% of total variation</b> | <b>F (DFn, DFd)</b> | <b>P value</b> | <b>Summary</b> |
|------------------------------|-----------------------------|---------------------|----------------|----------------|
| Age                          | 0.868                       | F (1, 58) = 0.6877  | 0.4104         | ns             |
| Sex                          | 4.171                       | F (1, 58) = 3.304   | 0.0743         | ns             |
| LPS                          | 1.078                       | F (1, 58) = 0.8543  | 0.3592         | ns             |
| Age x Sex                    | 6.652                       | F (1, 58) = 5.270   | 0.0253         | *              |
| Age x LPS                    | 9.392                       | F (1, 58) = 7.441   | 0.0084         | **             |
| Sex x LPS                    | 0.1712                      | F (1, 58) = 0.1356  | 0.714          | ns             |
| Age x Sex x LPS              | 1.807                       | F (1, 58) = 1.431   | 0.2364         | ns             |

  

| <b>Posthoc: Šidák's multiple comparisons test</b> | <b>t</b> | <b>DF</b> | <b>Adjusted P value</b> | <b>Summary</b> |
|---------------------------------------------------|----------|-----------|-------------------------|----------------|
| Adult:Male - Saline vs. Aged:Male - Saline        | 0.03214  | 58        | >0.9999                 | ns             |
| Adult:Male - LPS vs. Aged:Male - LPS              | 1.516    | 58        | 0.8244                  | ns             |
| Adult:Female - Saline vs. Aged:Female - Saline    | 3.486    | 58        | 0.0112                  | *              |
| Adult:Female - LPS vs. Aged:Female - LPS          | 0.4041   | 58        | >0.9999                 | ns             |
| Adult:Male - Saline vs. Adult:Male - LPS          | 0.4548   | 58        | >0.9999                 | ns             |
| Adult:Female - Saline vs. Adult:Female - LPS      | 1.227    | 58        | 0.9529                  | ns             |
| Aged:Male - Saline vs. Aged:Male - LPS            | 1.132    | 58        | 0.974                   | ns             |
| Aged:Female - Saline vs. Aged:Female - LPS        | 2.829    | 58        | 0.0741                  | ns             |
| Adult:Male - Saline vs. Adult:Female - Saline     | 0.6089   | 58        | >0.9999                 | ns             |
| Adult:Male - LPS vs. Adult:Female - LPS           | 0.1632   | 58        | >0.9999                 | ns             |
| Aged:Male - Saline vs. Aged:Female - Saline       | 3.002    | 58        | 0.0464                  | *              |
| Aged:Male - LPS vs. Aged:Female - LPS             | 1.42     | 58        | 0.8781                  | ns             |

**Figure 7F: Meninges CD4+ T Cells**

| <b>Analysis: 3-way ANOVA</b> | <b>% of total variation</b> | <b>F (DFn, DFd)</b> | <b>P value</b> | <b>Summary</b> |
|------------------------------|-----------------------------|---------------------|----------------|----------------|
| Age                          | 7.34                        | F (1, 58) = 6.538   | 0.0132         | *              |
| Sex                          | 4.51                        | F (1, 58) = 4.017   | 0.0497         | *              |
| LPS                          | 0.5573                      | F (1, 58) = 0.4964  | 0.4839         | ns             |
| Age x Sex                    | 4.918                       | F (1, 58) = 4.381   | 0.0407         | *              |
| Age x LPS                    | 13.82                       | F (1, 58) = 12.31   | 0.0009         | ***            |
| Sex x LPS                    | 0.2331                      | F (1, 58) = 0.2076  | 0.6504         | ns             |
| Age x Sex x LPS              | 1.473                       | F (1, 58) = 1.312   | 0.2568         | ns             |

  

| <b>Posthoc: Šidák's multiple comparisons test</b> | <b>t</b> | <b>DF</b> | <b>Adjusted P value</b> | <b>Summary</b> |
|---------------------------------------------------|----------|-----------|-------------------------|----------------|
| Adult:Male - Saline vs. Aged:Male - Saline        | 1.398    | 58        | 0.8889                  | ns             |
| Adult:Male - LPS vs. Aged:Male - LPS              | 0.9607   | 58        | 0.9933                  | ns             |
| Adult:Female - Saline vs. Aged:Female - Saline    | 4.601    | 58        | 0.0003                  | ***            |
| Adult:Female - LPS vs. Aged:Female - LPS          | 0.002223 | 58        | >0.9999                 | ns             |
| Adult:Male - Saline vs. Adult:Male - LPS          | 0.986    | 58        | 0.9916                  | ns             |
| Adult:Female - Saline vs. Adult:Female - LPS      | 1.629    | 58        | 0.7487                  | ns             |
| Aged:Male - Saline vs. Aged:Male - LPS            | 1.417    | 58        | 0.8797                  | ns             |
| Aged:Female - Saline vs. Aged:Female - LPS        | 3.154    | 58        | 0.0302                  | *              |
| Adult:Male - Saline vs. Adult:Female - Saline     | 0.3629   | 58        | >0.9999                 | ns             |
| Adult:Male - LPS vs. Adult:Female - LPS           | 0.2802   | 58        | >0.9999                 | ns             |
| Aged:Male - Saline vs. Aged:Female - Saline       | 3.012    | 58        | 0.0451                  | *              |
| Aged:Male - LPS vs. Aged:Female - LPS             | 1.391    | 58        | 0.8923                  | ns             |

**Figure 7F: Meninges Teffs**

| <b>Analysis: 3-way ANOVA</b> | <b>% of total variation</b> | <b>F (DFn, DFd)</b> | <b>P value</b> | <b>Summary</b> |
|------------------------------|-----------------------------|---------------------|----------------|----------------|
| Age                          | 5.662                       | F (1, 58) = 5.203   | 0.0262         | *              |
| Sex                          | 11.67                       | F (1, 58) = 10.73   | 0.0018         | **             |
| LPS                          | 0.2753                      | F (1, 58) = 0.2530  | 0.6169         | ns             |
| Age x Sex                    | 5.049                       | F (1, 58) = 4.639   | 0.0354         | *              |
| Age x LPS                    | 10.88                       | F (1, 58) = 9.996   | 0.0025         | **             |
| Sex x LPS                    | 0.04526                     | F (1, 58) = 0.04159 | 0.8391         | ns             |
| Age x Sex x LPS              | 1.508                       | F (1, 58) = 1.385   | 0.244          | ns             |

  

| <b>Posthoc: Šidák's multiple comparisons test</b> | <b>t</b> | <b>DF</b> | <b>Adjusted P value</b> | <b>Summary</b> |
|---------------------------------------------------|----------|-----------|-------------------------|----------------|
| Adult:Male - Saline vs. Aged:Male - Saline        | 1.044    | 58        | 0.9863                  | ns             |
| Adult:Male - LPS vs. Aged:Male - LPS              | 0.9393   | 58        | 0.9945                  | ns             |
| Adult:Female - Saline vs. Aged:Female - Saline    | 4.338    | 58        | 0.0007                  | ***            |
| Adult:Female - LPS vs. Aged:Female - LPS          | 0.0486   | 58        | >0.9999                 | ns             |
| Adult:Male - Saline vs. Adult:Male - LPS          | 1.065    | 58        | 0.984                   | ns             |
| Adult:Female - Saline vs. Adult:Female - LPS      | 2.352    | 58        | 0.2349                  | ns             |
| Aged:Male - Saline vs. Aged:Male - LPS            | 0.9142   | 58        | 0.9957                  | ns             |
| Aged:Female - Saline vs. Aged:Female - LPS        | 1.97     | 58        | 0.484                   | ns             |
| Adult:Male - Saline vs. Adult:Female - Saline     | 0.121    | 58        | >0.9999                 | ns             |
| Adult:Male - LPS vs. Adult:Female - LPS           | 1.167    | 58        | 0.9674                  | ns             |
| Aged:Male - Saline vs. Aged:Female - Saline       | 3.384    | 58        | 0.0153                  | *              |
| Aged:Male - LPS vs. Aged:Female - LPS             | 2.483    | 58        | 0.1754                  | ns             |

**Figure 7F: Meninges Tregs**

| <b>Analysis: 3-way ANOVA</b>                      |                             |                     |                         |                |
|---------------------------------------------------|-----------------------------|---------------------|-------------------------|----------------|
|                                                   | <b>% of total variation</b> | <b>F (DFn, DFd)</b> | <b>P value</b>          | <b>Summary</b> |
| Age                                               | 14.54                       | F (1, 58) = 11.59   | 0.0012                  | **             |
| Sex                                               | 1.024                       | F (1, 58) = 0.8164  | 0.37                    | ns             |
| LPS                                               | 0.272                       | F (1, 58) = 0.2169  | 0.6432                  | ns             |
| Age x Sex                                         | 0.5871                      | F (1, 58) = 0.4681  | 0.4966                  | ns             |
| Age x LPS                                         | 10.25                       | F (1, 58) = 8.174   | 0.0059                  | **             |
| Sex x LPS                                         | 0.01797                     | F (1, 58) = 0.01433 | 0.9051                  | ns             |
| Age x Sex x LPS                                   | 0.2996                      | F (1, 58) = 0.2389  | 0.6269                  | ns             |
| <b>Posthoc: Šídák's multiple comparisons test</b> |                             |                     |                         |                |
|                                                   | <b>t</b>                    | <b>DF</b>           | <b>Adjusted P value</b> | <b>Summary</b> |
| Adult:Male - Saline vs. Aged:Male - Saline        | 2.518                       | 58                  | 0.1618                  | ns             |
| Adult:Male - LPS vs. Aged:Male - LPS              | 0.1773                      | 58                  | >0.9999                 | ns             |
| Adult:Female - Saline vs. Aged:Female - Saline    | 3.678                       | 58                  | 0.0062                  | **             |
| Adult:Female - LPS vs. Aged:Female - LPS          | 0.375                       | 58                  | >0.9999                 | ns             |
| Adult:Male - Saline vs. Adult:Male - LPS          | 0.8322                      | 58                  | 0.9982                  | ns             |
| Adult:Female - Saline vs. Adult:Female - LPS      | 1.399                       | 58                  | 0.8884                  | ns             |
| Aged:Male - Saline vs. Aged:Male - LPS            | 1.603                       | 58                  | 0.7671                  | ns             |
| Aged:Female - Saline vs. Aged:Female - LPS        | 2.003                       | 58                  | 0.4584                  | ns             |
| Adult:Male - Saline vs. Adult:Female - Saline     | 0.1814                      | 58                  | >0.9999                 | ns             |
| Adult:Male - LPS vs. Adult:Female - LPS           | 0.3859                      | 58                  | >0.9999                 | ns             |
| Aged:Male - Saline vs. Aged:Female - Saline       | 1.034                       | 58                  | 0.9874                  | ns             |
| Aged:Male - LPS vs. Aged:Female - LPS             | 0.6791                      | 58                  | 0.9998                  | ns             |
