# Supplementary material
Source: PubMed Central journal article supplement (PMC10790303)
Supplement: NIHMS1957616-supplement-Table_S9.pdf [file NIHMS1957616-supplement-Table_S9.pdf]

| <b>Figure 8A: Fear Conditioning - OVX</b>           |                             |                     |                |                |
|-----------------------------------------------------|-----------------------------|---------------------|----------------|----------------|
| <b>Analysis: 2-way ANOVA</b>                        | <b>% of total variation</b> | <b>F (DFn, DFd)</b> | <b>P value</b> | <b>Summary</b> |
| Interaction                                         | 1.205                       | F (1, 42) = 0.5338  | 0.4691         | ns             |
| OVX                                                 | 3.483                       | F (1, 42) = 1.543   | 0.2211         | ns             |
| LPS                                                 | 0.1424                      | F (1, 42) = 0.06308 | 0.8029         | ns             |
| <b>Figure 8B: Hippocampal <i>I1b</i> mRNA - OVX</b> |                             |                     |                |                |
| <b>Analysis: 2-way ANOVA</b>                        | <b>% of total variation</b> | <b>F (DFn, DFd)</b> | <b>P value</b> | <b>Summary</b> |
| Interaction                                         | 4.948                       | F (1, 16) = 1.263   | 0.2777         | ns             |
| OVX                                                 | 13.95                       | F (1, 16) = 3.561   | 0.0774         | ns             |
| LPS                                                 | 13.61                       | F (1, 16) = 3.474   | 0.0808         | ns             |
| <b>Figure 8C: Microglia <i>I1b</i> mRNA - OVX</b>   |                             |                     |                |                |
| <b>Analysis: 2-way ANOVA</b>                        | <b>% of total variation</b> | <b>F (DFn, DFd)</b> | <b>P value</b> | <b>Summary</b> |
| Interaction                                         | 1.245                       | F (3, 20) = 0.7365  | 0.5425         | ns             |
| OVX                                                 | 0.4917                      | F (1, 20) = 0.8729  | 0.3613         | ns             |
| LPS                                                 | 83.33                       | F (3, 20) = 49.31   | <0.0001        | ****           |
